# Supplementary material
Source: publisher figshare collection journal article supplement (https://gsajournals.figshare.com/ndownloader/files/15051707)
Supplement: Supplementary file 1 [file 15051707]

## Sheet: Table Note 1b_SuppInfo
Table Note 1b_SuppInfo. Enriched GO terms identified in downregulated genes in cisplatin-treated versus vehicle-treated wt melanoma medaka.
Database	Name	ID	fold enrichment; p-val
biological process	synaptic transmission	GO:0007268	O=105;E=15.40;R=6.82;rawP=1.89e-59
	transmission of nerve impulse	GO:0019226	O=106;E=17.38;R=6.10;rawP=4.64e-55
	multicellular organismal signaling	GO:0035637	O=106;E=17.76;R=5.97;rawP=4.12e-54
	neurological system process	GO:0050877	O=131;E=29.26;R=4.48;rawP=3.41e-53
	cell-cell signaling	GO:0007267	O=118;E=25.99;R=4.54;rawP=7.53e-48
	system process	GO:0003008	O=140;E=40.09;R=3.49;rawP=3.74e-44
	multicellular organismal process	GO:0032501	O=231;E=133.48;R=1.73;rawP=7.18e-27
	single-multicellular organism process	GO:0044707	O=230;E=132.72;R=1.73;rawP=9.36e-27
	ion transport	GO:0006811	O=76;E=22.92;R=3.32;rawP=4.14e-21
cellular component	synapse part	GO:0044456	O=75;E=8.31;R=9.03;rawP=2.75e-50
	synapse	GO:0045202	O=79;E=10.98;R=7.19;rawP=2.97e-45
	neuron projection	GO:0043005	O=88;E=14.62;R=6.02;rawP=4.43e-44
	synaptic membrane	GO:0097060	O=47;E=4.83;R=9.73;rawP=4.84e-33
	plasma membrane	GO:0005886	O=204;E=96.33;R=2.12;rawP=1.23e-32
	cell projection	GO:0042995	O=101;E=27.63;R=3.66;rawP=1.48e-31
	cell periphery	GO:0071944	O=204;E=98.30;R=2.08;rawP=2.49e-31
	dendrite	GO:0030425	O=51;E=7.97;R=6.40;rawP=1.26e-26
	intrinsic to plasma membrane	GO:0031226	O=95;E=28.39;R=3.35;rawP=1.36e-26
	integral to plasma membrane	GO:0005887	O=93;E=27.40;R=3.39;rawP=1.86e-26
molecular function	channel activity	GO:0015267	O=53;E=9.54;R=5.56;rawP=8.41e-25
	ion gated channel activity	GO:0022839	O=46;E=6.88;R=6.69;rawP=5.02e-25
	gated channel activity	GO:0022836	O=46;E=6.88;R=6.69;rawP=5.02e-25
	transmembrane transporter activity	GO:0022857	O=78;E=21.00;R=3.71;rawP=9.60e-25
	transporter activity	GO:0005215	O=89;E=27.15;R=3.28;rawP=1.68e-24
	substrate-specific channel activity	GO:0022838	O=51;E=9.13;R=5.59;rawP=5.50e-24
	substrate-specific transmembrane transporter activity	GO:0022891	O=73;E=19.18;R=3.81;rawP=9.65e-24
	ion channel activity	GO:0005216	O=50;E=8.92;R=5.60;rawP=1.40e-23
	ion transmembrane transporter activity	GO:0015075	O=69;E=17.84;R=3.87;rawP=8.22e-23
